# Supplementary material for: Exploring Psychological Factors for COVID-19 Vaccination Intention in Taiwan
Source: Vaccines (Basel). 2021 Jul 8;9(7):764. doi: 10.3390/vaccines9070764 (PMC8310074; doi:10.3390/vaccines9070764)
Supplement: Supplementary file 1 [file vaccines-09-00764-s001.zip › vaccines-1274946-supplementary.pdf]

## The Survey Questions

| Construct                                    | Items                                                                                                                                                                                                                                                                                                                                                                                                                                                                                                                                                                                                                                                                                                                                                                                                                                                                                                                                                                                                                                                                                                                                   |
|----------------------------------------------|-----------------------------------------------------------------------------------------------------------------------------------------------------------------------------------------------------------------------------------------------------------------------------------------------------------------------------------------------------------------------------------------------------------------------------------------------------------------------------------------------------------------------------------------------------------------------------------------------------------------------------------------------------------------------------------------------------------------------------------------------------------------------------------------------------------------------------------------------------------------------------------------------------------------------------------------------------------------------------------------------------------------------------------------------------------------------------------------------------------------------------------------|
| Mental models of virus                       | <p>I think the coronavirus was artificially produced, and spread deliberately.</p> <p>I think the coronavirus was artificially produced, and spread accidentally.</p> <p>I think the coronavirus emerged naturally, and spread deliberately.</p> <p>I think the coronavirus emerged naturally, and spread accidentally.</p>                                                                                                                                                                                                                                                                                                                                                                                                                                                                                                                                                                                                                                                                                                                                                                                                             |
| Positive attitudes towards COVID-19 vaccines | <p>A coronavirus vaccination should be mandatory for everyone who is able to have it.</p> <p>If I get a coronavirus vaccination, I will be protected against coronavirus.</p> <p>If I don't get a coronavirus vaccination and end up getting coronavirus, I would regret not getting the vaccination.</p> <p>Other people like me will get a coronavirus vaccination.</p> <p>My family would approve of my having a coronavirus vaccination.</p> <p>My friends would approve of my having a coronavirus vaccination.</p> <p>A coronavirus vaccine will allow us to get back to 'normal'.</p>                                                                                                                                                                                                                                                                                                                                                                                                                                                                                                                                            |
| Negative attitudes towards COVID-19 vaccines | <p>I would be worried about experiencing side effects from a coronavirus vaccination.</p> <p>I might regret getting a coronavirus vaccination if I later experienced side effects from the vaccination.</p> <p>A coronavirus vaccination will be too new for me to be confident about getting vaccinated.</p>                                                                                                                                                                                                                                                                                                                                                                                                                                                                                                                                                                                                                                                                                                                                                                                                                           |
| Belief of vaccine-induced infection          | A coronavirus vaccination could give me coronavirus.                                                                                                                                                                                                                                                                                                                                                                                                                                                                                                                                                                                                                                                                                                                                                                                                                                                                                                                                                                                                                                                                                    |
| Powerlessness                                | <p>I feel that the coronavirus is too big for my actions to have an impact.</p> <p>I feel that my actions will not affect the outcome of coronavirus.</p> <p>I feel that my contribution is just a drop in the ocean and so is insignificant.</p>                                                                                                                                                                                                                                                                                                                                                                                                                                                                                                                                                                                                                                                                                                                                                                                                                                                                                       |
| Vaccination intention (General)              | If COVID-19 vaccines are available in Taiwan, I will get vaccinated.                                                                                                                                                                                                                                                                                                                                                                                                                                                                                                                                                                                                                                                                                                                                                                                                                                                                                                                                                                                                                                                                    |
| Vaccination intention (Source specific)      | <p>If social media promote COVID-19 vaccines, I will get vaccinated.</p> <p>If friends around me encourage me to get a COVID-19 vaccine, I will get vaccinated.</p> <p>If the government promotes COVID-19 vaccines, I will get vaccinated.</p> <p>If health professionals (doctors or nurses) promote COVID-19 vaccines, I will get vaccinated.</p> <p>If mainstream media promote COVID-19 vaccines, I will get vaccinated.</p>                                                                                                                                                                                                                                                                                                                                                                                                                                                                                                                                                                                                                                                                                                       |
| Demographic information                      | <p>What is your gender?</p> <p>- "female", "male"</p> <p>What is your age?</p> <p>- "20-24", "25-29", "30-34", "35-39", "40-44", "45-49", "50-54", "55-59", and "60 and above"</p> <p>Where is your city/county of residence?</p> <p>- 22 local administrative divisions of Taiwan, and 1 option of "others"</p> <p>What is your level of education?</p> <p>- "primary school", "junior high school", "senior high school", "vocational school", "bachelor", "master or doctor"</p> <p>Your monthly income?</p> <p>- "&lt;20,000 NTD", "20,000-40,000 NTD", "40,000-60,000 NTD", "60,000-80,000 NTD", "80,000-100,000 NTD", "100,000-120,000 NTD", "120,000-140,000 NTD", "140,000-160,000 NTD", "160,000-180,000 NTD", "180,000-200,000 NTD", "&gt;200,000NTD", "I don't know."</p> <p>What is your occupation?</p> <p>- "student", "homemaker", "retiree", "agricultural, forestry and fishery", "food service", "manufacturing", "health care", "construction", "self employed", "telecommunication service", "financial and insurance service", "public servant", "mass communication", "information technology", "hospitality"</p> |
